# Supplementary material for: Direct Sequencing from the Minimal Number of DNA Molecules Needed to Fill a 454 Picotiterplate
Source: PLOS journal article supplement (doi:10.1371/journal.pone.0097379), 2014-06-02
Supplement: S3 (10.1371/journal.pone.0097379.s003) [file journal.pone.0097379.s003]

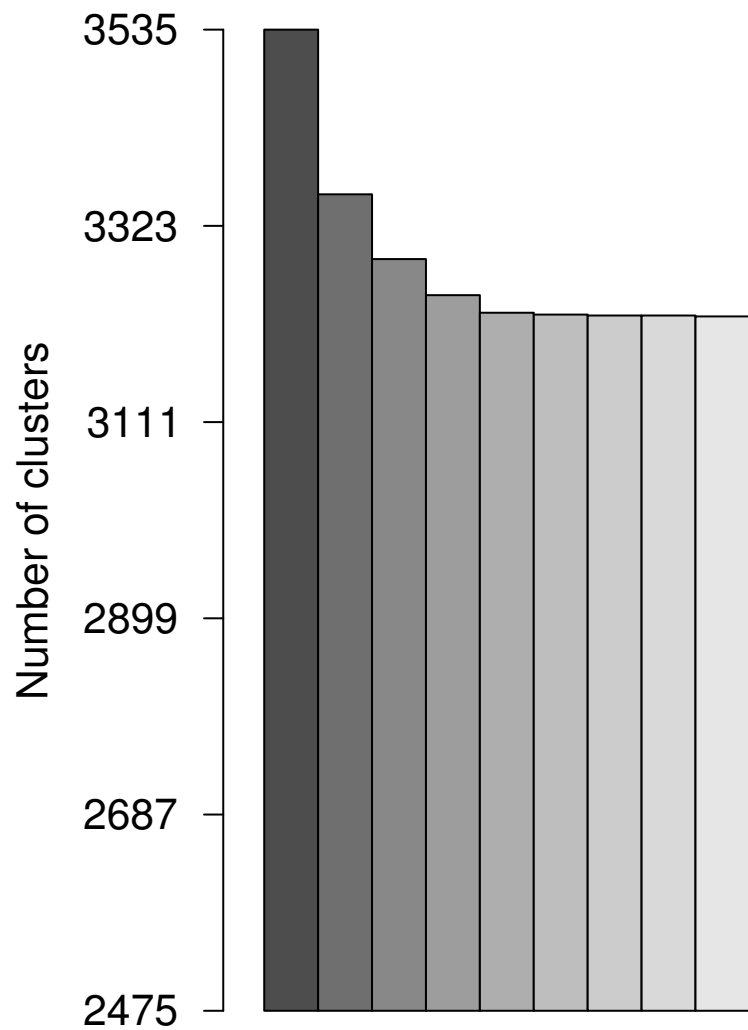

Direct sequencing

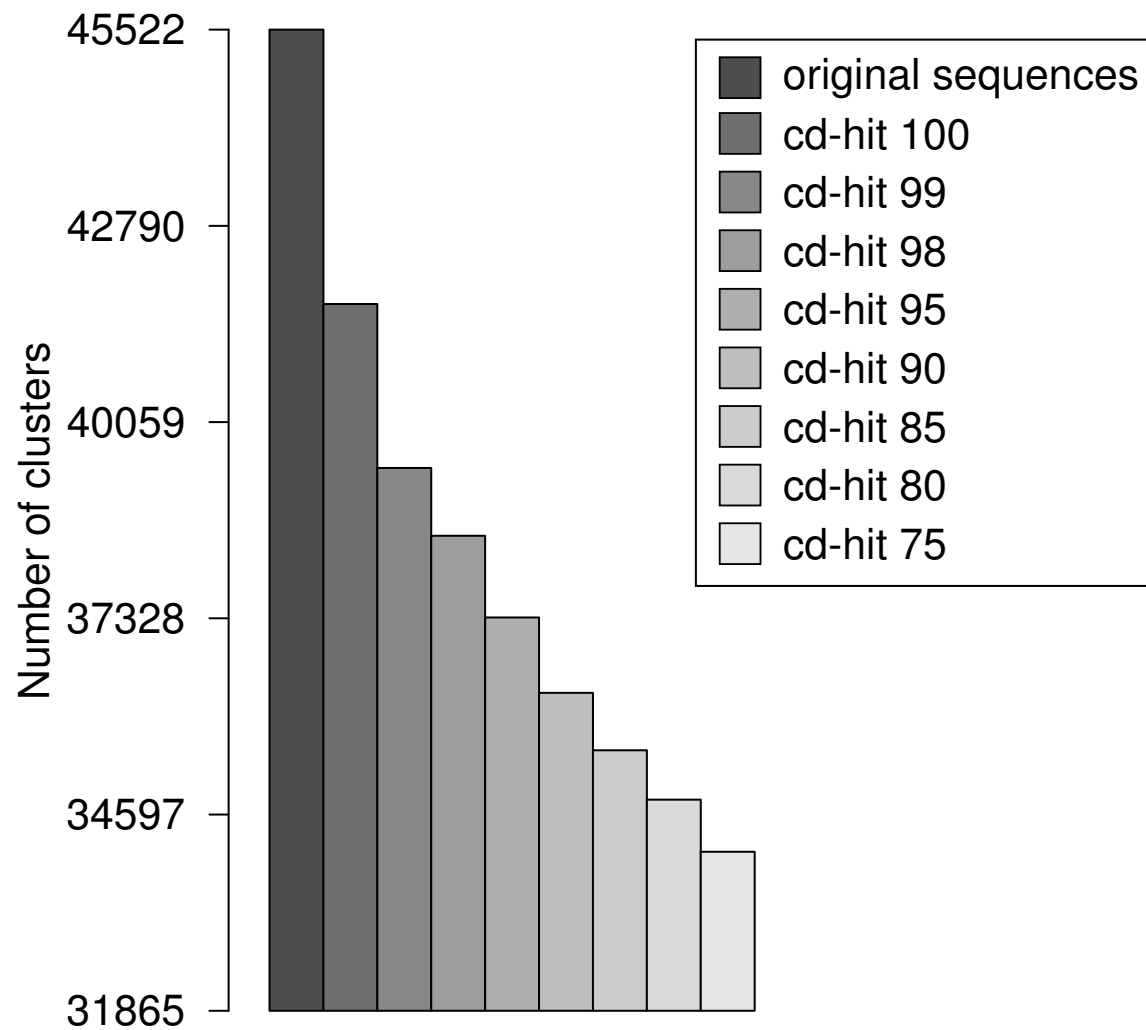

Multiple displacement  
amplification
