# Supplementary material for: Direct Sequencing from the Minimal Number of DNA Molecules Needed to Fill a 454 Picotiterplate
Source: PLOS journal article supplement (doi:10.1371/journal.pone.0097379), 2014-06-02
Supplement: S6 (10.1371/journal.pone.0097379.s006) [file journal.pone.0097379.s006]

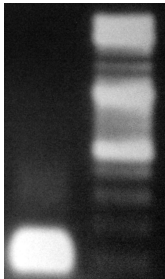

prepared  
library

selfligated  
adaptors

A-DS-Y3

after 2nd purification

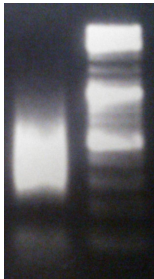

1000 bp

500 bp

A-DS-Y3

after 4th purification
